# Supplementary material for: Network of vascular diseases, death and biochemical characteristics in a set of 4,197 patients with type 1 diabetes (The FinnDiane Study)
Source: Springer Nature journal article supplement (doi:10.1186/1475-2840-8-54), 2009-01-01
Supplement: Additional file 3 [file 1475-2840-8-54-s3.pdf]

## Additional file 3

# The Finnish Diabetic Nephropathy Study Centers

|                                        |                          |                                      |                         |
|----------------------------------------|--------------------------|--------------------------------------|-------------------------|
| Anjalankoski health care center        | Sirpa Koivula            | Helsinki Herttoniemi Hospital        | Markku Saraheimo        |
|                                        | Tarja Uggeldahl          |                                      | Kerstin Wickström       |
| Espoo health care center, Espoonlahti  | Anita Nikkola            | Helsinki University Central Hospital | Paula Nikkanen          |
|                                        | Eila Ritola              |                                      | Pirkko Salmi            |
| Espoo health care center, Samaria      | Eija Oukko-Ruponen       | Hyvinkää health care center          | Sisko Klemetti          |
| Espoo health care center, Tapiola      | Hanna Saarinen           |                                      | Teija Nyandoto          |
|                                        | Merja Kataja-Tuomola     |                                      | Eija Rontu              |
|                                        | Marjatta Niska           |                                      | Susanna Satuli-Autere   |
| Espoo health care center, Viherlaakso  | Anne Lyytinen            | Iisalmi Hospital                     | Eija Toivanen           |
|                                        | Satu Raumavirta-Koivisto |                                      | Jaana Hyytiäinen        |
|                                        | Marjo Kovanen            | Jokilaakso Hospital                  | Tuula Laitinen          |
| Etelä-Karjala Central Hospital         | Tuula Ensala             |                                      | Jukka Lagerstam         |
|                                        | Esko Hussi               | Jorvi Hospital                       | Suvmirja Aranko         |
|                                        | Jukka Toivonen           |                                      | Tarmo Leppälä           |
|                                        | Tuula Matikainen         |                                      | Suvi Ervasti            |
|                                        | Raimo Vanamo             |                                      | Ritva Kauppinen-Mäkelin |
|                                        | Helga Hasu               |                                      | Arto Kuusisto           |
| Heinola health care center             | Päivi Hentunen           |                                      | Katriina Nikkilä        |
|                                        | Jukka Lagerstam          |                                      | Leena Pekkonen          |
| Helsinki health care center, Puistola  | Kari Pohjola             | Jyväskylä health care center         | Kirsti Nuorva           |
|                                        | Heli Silvennoinen        |                                      | Marja Tiihonen          |
|                                        | Tiina Simonen            | Järvenpää health care center         | Tuula Kinnunen          |
|                                        | Hannele Kari             |                                      | Liisa Nikulainen        |
| Helsinki health care center, Suutarila | Anja Kaprio              |                                      | Tuula Salokangas        |
|                                        | Birgitta Rantaeskola     | Kainuu Central Hospital              | Silja Jokelainen        |
| Helsinki health care center, Töölö     | Jari Haaga               |                                      | Paula Kemppainen        |
|                                        | Pirjo Kääriäinen         |                                      | Anna-Maria Mankinen     |
|                                        | Anna-Liisa Pietiläinen   |                                      | Marja Sankari           |

|                                  |                                                                                                                                                                                   |                                                     |                                                                                                                                                                                                                 |
|----------------------------------|-----------------------------------------------------------------------------------------------------------------------------------------------------------------------------------|-----------------------------------------------------|-----------------------------------------------------------------------------------------------------------------------------------------------------------------------------------------------------------------|
| Kanta-Häme Central Hospital      | Tuula Myllykangas<br>Pirjo Kinnunen<br>Anja Orvola<br>Tapani Salonen<br>Annukka Vähänen                                                                                           | Kuopio University Central Hospital                  | Erja Huttunen<br>Risto Ikäheimo<br>Päivi Kiljander<br>Markku Laakso<br>Timo Lakka                                                                                                                               |
| Kerava health care center        | Helene Stuckey<br>Paula Suominen                                                                                                                                                  |                                                     | Leena Moilanen<br>Leo Niskanen                                                                                                                                                                                  |
| Keski-Pohjanmaa Central Hospital | Stefan Anderson<br>Beatrice Asplund<br>Ulrika Byskata<br>Ingvor Byskata<br>Toini Virkkala<br>Päivi Liedes                                                                         |                                                     | Ulla Tuovinen<br>Ilkka Vauhkonen<br>Erkki Voutilainen<br>Pauli Karhapää<br>Päivi Kekäläinen<br>Erkki Lampainen                                                                                                  |
| Keski-Suomi Central Hospital     | Terje Forslund<br>Pirkko Koskiaho<br>Marianne Laukkanen<br>Juha Saltevo<br>Marja Tiihonen<br>Pirkko Koskiaho<br>Anne Halonen<br>Arvo Koistinen<br>Esa Leppänen<br>Anna-Mari Koski | Kuusamo health care center                          | Erja Isopoussu<br>Tapio Kääriäinen<br>Eero Vierimaa<br>Esa Kilkki<br>Liisa Riihelä<br>Mare Riihelä<br>Leena Ryysy<br>Reino Paldanius<br>Taina Meriläinen<br>Paula Poukka<br>Tuula Tikkanen<br>Riitta Savolainen |
| Kirkkonummi health care center   | Anja Lappalainen<br>Maisa Liimatainen<br>Jaana Santaholma                                                                                                                         | Kuusankoski Hospital                                | Esa Kilkki<br>Liisa Riihelä<br>Mare Riihelä<br>Leena Ryysy<br>Reino Paldanius<br>Taina Meriläinen<br>Paula Poukka<br>Tuula Tikkanen<br>Riitta Savolainen                                                        |
| Kivelä Hospital, Helsinki        | Ari Aimolahti<br>Maarit Kärki                                                                                                                                                     | Kymenlaakso Central Hospital                        | Aulikki Mäkelä<br>Marjukka Tanner<br>Eija Behm                                                                                                                                                                  |
| Koskela Hospital, Helsinki       | Maija Lehtimäki<br>Nina Uhlenius<br>Eeva Huovinen<br>Veikko Ilkka                                                                                                                 | Laakso Hospital, Helsinki                           | Pirkko Nyländen<br>Hilkka Laukkanen<br>Pirjo Myllykoski<br>Inge-Maj Jousmaa<br>Jukka Rinne                                                                                                                      |
| Kotka health care center         | Eeva Pälikkö-Kontinen<br>Annika Vanhanen                                                                                                                                          | Lahti City Hospital                                 | Pirjo Linkola<br>Irja Pulli                                                                                                                                                                                     |
| Kouvola health care center       | Erkki Koskinen<br>Anna Borgman<br>Taimi Siitonen                                                                                                                                  | Länsi-Pohja Central Hospital                        | Sirkka Severinkangas<br>Timo Tulokas                                                                                                                                                                            |
|                                  |                                                                                                                                                                                   | Länsi-Uusimaa Hospital                              |                                                                                                                                                                                                                 |
|                                  |                                                                                                                                                                                   | Lappeenranta health care center,<br>Armila Hospital |                                                                                                                                                                                                                 |
|                                  |                                                                                                                                                                                   | Lappi Central Hospital                              |                                                                                                                                                                                                                 |

|                               |                                                                                                                               |                                                                               |                                                                                                         |
|-------------------------------|-------------------------------------------------------------------------------------------------------------------------------|-------------------------------------------------------------------------------|---------------------------------------------------------------------------------------------------------|
| Lohja Hospital                | Liisa Hyvärinen<br>Tuula Granlund<br>Mikko Saari<br>Tuula Salonen                                                             | Palokka health care center, Palokka<br>Palokka health care center, Vaajakoski | Tarja Tick-Sinkkilä<br>Leena Welling<br>Kirsti Mäkinen<br>Päivi Sopanen                                 |
| Loimaa health care center     | Reija Tähtinen<br>Pirjo Eloranta<br>Arja Mäkelä                                                                               | Pieksämäki Hospital                                                           | Mari Tamminen<br>Markku Taskinen<br>Maj-Len Holmbäck                                                    |
| Lounais-Häme Hospital         | Tarja Kalliomäki<br>Juha Koskelainen<br>Riitta Nikkanen<br>Vesa Salonen<br>Niilo Savolainen<br>Hannu Sulonen<br>Eija Valtonen | Pietarsaari Hospital                                                          | Bo Isomaa<br>Leena Sarelin<br>Laura Hyttinen<br>Päivi Kekäläinen<br>Maija Pietarinen<br>Anneli Rissanen |
| Malmi Hospital, Helsinki      | Helena Lanki<br>Seija Moilanen                                                                                                | Pohjois-Karjala Central Hospital                                              | Risto Laitinen<br>Hannu Turtola<br>Ulla Maija Henttula                                                  |
| Mänttä Hospital               | Marju Tilly-Kiesi<br>Anne-Mirjami Hänninen<br>Ismo Pirttiniemi                                                                | Pori City Hospital                                                            | Pirjo Merensalo<br>Kirsi Sävelä<br>Terttu Viitala<br>Päivi Ahonen                                       |
| Mikkeli Central Hospital      | Anita Gynther<br>Maarit Salminen<br>Tuomo Vänttinen                                                                           | Porvoo Hospital                                                               | Heidi Johansson<br>Sirikka Rämö<br>Bjarne Rask<br>Marjatta Kallion<br>Anne Holma                        |
| Nurmijärvi health care center | Mikko Honkasalo<br>Marko Miettinen<br>Päivi Nurminen                                                                          | Raahe Hospital                                                                | Matti Honkala<br>Aino Tuomivaara<br>Riitta Vainionpää<br>Kaisa Laine                                    |
| Oulaskangas Hospital          | Elina Jokelainen<br>Pirkko-Liisa Jylkkä<br>Elsi Kaarlela<br>Jari Vuolaspuro                                                   | Rauma Hospital                                                                | Taru Salminen<br>Paula Ketola<br>Kaisa Saarinen                                                         |
| Oulu health care center       | Rauni Häkkinen<br>Liisa Hiltunen<br>Sirikka Keinänen-Kiukaanniemi                                                             | Riihimäki Hospital                                                            | Pirkko Aalto<br>Marja Lanni<br>Irmeli Laitaharju<br>Eija Immonen<br>Leena Juurinen                      |
| Päijät-Häme Central Hospital  | Hannu Haapamäki<br>Satu Hämäläinen<br>Antero Helanterä<br>Vesa Ilvesmäki<br>Hilkka Miettinen                                  |                                                                               |                                                                                                         |

|                                     |                                                                                                                                                                                                                  |                                                                                         |                                                                                                                                                                                                                               |
|-------------------------------------|------------------------------------------------------------------------------------------------------------------------------------------------------------------------------------------------------------------|-----------------------------------------------------------------------------------------|-------------------------------------------------------------------------------------------------------------------------------------------------------------------------------------------------------------------------------|
| Salo Hospital                       | Jouni Lapinleimu<br>Pirkko Rautio<br>Merja Virtanen<br>Anita Alanko                                                                                                                                              |                                                                                         | Heikki Oksala<br>Tuija Oksanen<br>Kristiina Salonen<br>Sirkku Tulokas                                                                                                                                                         |
| Satakunta Central Hospital          | Markku Asola<br>Paavo Pääkkönen<br>Marjo Pentti<br>Marja Rautavirta<br>Pertti Kunelius<br>Sirkku Mannila                                                                                                         | Tiirismaa health care center<br><br>Turku health care center                            | Hilkka Tauriainen<br>Leena Petlin<br>Liisa Savolainen<br>Tiina Kivelä<br>Anne Artukka<br>Irmeli Hämäläinen                                                                                                                    |
| Savonlinna Central Hospital         | Tuula Pulli<br>Päivi Sallinen<br>Eija Toivanen<br>Helena Valtonen<br>Aarne Vartia                                                                                                                                |                                                                                         | Päivi Kokkila<br>Lea Sorvari<br>Markku Vähätalo<br>Hille Virtamo                                                                                                                                                              |
| Seinäjoki Central Hospital          | Eeva Korpi-Hyövälti<br>Terhikki Latvala<br>Esko Leijala<br>Tarja Nyrhilä                                                                                                                                         | Turku University Central Hospital                                                       | Kaija Breitholz<br>Raija Eskola<br>Kaj Metsärinne<br>Riikka Neva<br>Ulla Pietilä                                                                                                                                              |
| Tammisaari Hospital                 | Jukka Rinne<br>Inge-Maj Jousma                                                                                                                                                                                   |                                                                                         | Pirjo Saarinen<br>Riitta Tuominen                                                                                                                                                                                             |
| Tampere health care center          | Pekka Alarotu<br>Liisa Caloniun<br>Seppo Gummerus<br>Paula Helin<br>Tarja Kaitala<br>Helena Kirkkopelto-Jokinen<br>Eila Kujansuu<br>Taru Niskanen<br>Atte Vadén<br>Timo Saaristo<br>Marjo Kuortti<br>Arja Kallio | Vaajakoski health care center<br><br>Vaasa Central Hospital<br><br>Valkeakoski Hospital | Markku Asola<br>Sari Äyräpää<br>Päivi Sopanen<br>Kirsti Mäkinen<br>Stig Bergkulla<br>Ulla Hautamäki<br>Vivi-Ann Myllyniemi<br>Irma Rusk<br>Terhi Immonen<br>Seppo Ojanen<br>Maisa Rautiainen<br>Eija Valtonen<br>Hannu Ylönen |
| Tampere University Central Hospital | Ilpo Ala-Houhala<br>Tuula Kuningas<br>Paula Lampinen<br>Marita Määttä                                                                                                                                            | Vammala Hospital                                                                        | Irma Isomäki<br>Leena Mustaniemi<br>Merja Tapiolinna-Mäkela                                                                                                                                                                   |

|                                         |                                                                                                             |
|-----------------------------------------|-------------------------------------------------------------------------------------------------------------|
| Vantaa health care center, Korso        | Riitta Kroneld<br>Jaana Vahtola                                                                             |
| Vantaa health care center, Länsimäki    | Riitta Toivonen<br>Raila Ahonen<br>Marja Ivaska-Suomela<br>Anu Jauhiainen<br>Sari Kultti<br>Pirjo Kiviniemi |
| Vantaa health care center, Martinlaakso | Merja Laine<br>Tiina Pellonpää<br>Riitta Puranen                                                            |
| Vantaa health care center, Myyrmäki     | Anne Airas<br>Jukka Laakso                                                                                  |
| Vantaa health care center, Rekola       | Matti Eerola<br>Eeva Jatkola                                                                                |
| Vantaa health care center, Tikkurila    | Riitta Lönnblad<br>Jari Mäkelä<br>Anita Malm<br>Elli Rautamo                                                |
| Åland Central Hospital                  | Hans Granlund<br>Ann-Christin Johnsson<br>Monica Forsen                                                     |
| Äänekoski health care center            | Satu Savolainen<br>Tapani Marjanen                                                                          |
